# Supplementary material for: Decreased Expression of the Aryl Hydrocarbon Receptor in Ocular Behcet’s Disease
Source: Hindawi journal article supplement (doi:10.1155/2014/195094), 2014-01-01

**Ctrl**

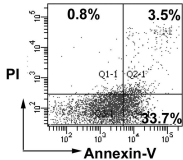

**FICZ**

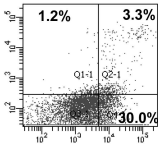

**ITE**

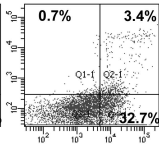

Supplement: f1 [file 195094.f1.pdf]
